# Supplementary material
Source: publisher figshare collection journal article supplement (https://springernature.figshare.com/ndownloader/files/22406376)
Supplement: Supplementary file 1 [file 22406376]

## Sheet: lasso_only_numeric
Variable	LASSO Coefficient (mean)	Standard deviation
Week 52 CD4/CD8 ratio	174.043	58.3452
Week 39 CD4/CD8 ratio	104.626	14.138
(Intercept)	94.5123	25.8509
Week 24 creatinine	28.4157	11.3313
Week 8 CD4/CD8 ratio	22.7832	14.3081
Basal %CD4 T lymphocytes	-11.0915	1.74022
Week 52 % CD4 T lymphocytes	6.37493	1.79767
Week 52 %CD8 T lymphocytes	-1.84405	0.558275
Basal hematocrit	-1.48508	0.19547
Number of clinical events in the first 24 weeks on ART	0.848913	1.05507
Week 12 CD4/CD8 ratio	0.753852	5.85827
Week 24 CD4/CD8 ratio	0.566409	3.41895
Basal creatinine	-0.543694	1.8154
Week 12 %CD4 lymphocytes	0.208001	0.321882
Week 24 uric acid	0.205683	0.381324
Basal leucocyte count	-0.192596	0.343122
Week 24 glucose	-0.192562	0.171537
Week 52 viral load	-0.165075	0.147602
Week 52 CD8 T cell count	0.142659	0.0131344
Week 24 CD4 T cell count	0.0854503	0.0231785
Week 24 glutamic oxaloacetic transaminase	-0.0824112	0.0443016
Week 39 CD4 T cell count	0.0572615	0.0187157
Week 0 CD8 T cell count	-0.0420882	0.00309759
Week 39 viral load	0.0292765	0.0701125
Week 24 %CD8 lymphocytes	-0.0112927	0.0592582
Week 24 cholesterol	-0.00911612	0.024232
Week 12 CD8 T cell count	-0.00396622	0.0036567
Week 24 %CD4 lymphocytes	0.00363417	0.0275369
Basal glucose	0.00227703	0.0203174
Week 24 lactate dehydrogenase	-0.00129166	0.00489637
Week 24 triglycerides	-0.00125105	0.00456213
Week 39 %CD8 lymphocytes	-0.000479878	0.00392797
Week 12 CD4 T cell count	-0.000228625	0.00187137
Week 8 viral load	8.55e-05	0.000158083
Week 39 CD8 T cell count	3.27e-05	0.000268039
Basal viral load	2.69e-05	2.51e-06
Week 08 CD8 T cell count	-1.75e-05	0.000143349
Interesept	0	0
Basal platelet count	0	0
Basal uric acid	0	0
Basal %CD8 lymphocytes	0	0
Basal CD4/CD8 ratio	0	0
Week 08 CD4 T cell count	0	0
Week 8 %CD4 lymphocytes	0	0
Week 8 %CD4 lymphocytes	0	0
Week 12 %CD8 lymphocytes	0	0
Week 24 urea	0	0
Week 24 direct bilirubin	0	0
Week 24 glutamic pyruvic transaminase	0	0
Week 24 alkaline phosphatase	0	0
Week 24 CD8 T cell count	0	0
Week 39 %CD4 lymphocytes	0	0
Age (years)	0	0
Week 12 viral load	0	0
